# Supplementary material for: Nucleation-enhanced condensation and fast shedding on self-lubricated silicone organogels
Source: Royal Society of Chemistry journal article supplement (doi:10.1039/d3sm00365e), 2023-01-01
Supplement: d3sm00365e1.pdf [file d3sm00365e1.pdf]

Movie S1: **Water condensation on PDMS:** Optical microscope movie (magnitude X16) of condensed water droplets on horizontal surface of PDMS (accelerated time X10).

Movie S2: **Water condensation on iPDMS:** Optical microscope movie (magnitude X16) of condensed water droplets on horizontal surface of iPDMS (real time, 15 FPS).

Movie S3: **Ability to collect condensed water for PDMS and iPDMS-2 $\mu$ m:** Condensation on PDMS and iPDMS placed side by side on a vertical surface (accelerated time X50).

Movie S4: **Zoom on the condensation on vertical iPDMS-2 $\mu$ m surface:** Towards droplets mobility and re-nucleation (accelerated time X20).
