# Supplementary material for: Nucleation-enhanced condensation and fast shedding on self-lubricated silicone organogels
Source: Royal Society of Chemistry journal article supplement (doi:10.1039/d3sm00365e), 2023-01-01
Supplement: d3sm00365e2.pdf [file d3sm00365e2.pdf]

## Nucleation-enhanced condensation and fast shedding on self-lubricated silicone organogels

### Supplementary Information

Nicolas Lavielle\*, Daniel Beysens and Anne Mongruel

Physique et Mécanique des Milieux Hétérogènes, CNRS, ESPCI, PSL Research University,  
Sorbonne Université, Sorbonne Paris Cité, 75005 Paris, France

Corresponding author: nicolas.lavielle@espci.fr

#### Supplementary note: Calculation of the amplitude constants $A$ and $E$ .

Inspired by references [40] and [42], the calculation of the amplitude constants  $A$  (condensation) and  $E$  (evaporation) can be expressed as follows:

$$A = E = \frac{4D(c_{\infty} - c_s)f(\Theta)}{3\rho_w \sin\Theta G(\Theta)}$$

With:

$$f(\Theta) = \frac{1}{2}(0.00008957 + 0.6333\Theta + 0.116\Theta^2 - 0.08878\Theta^3 + 0.01033\Theta^4)$$

and

$$G(\Theta) = \frac{2 - 3\cos\Theta + \cos\Theta^3}{3\sin\Theta^3}$$

$D$  being the diffusion coefficient of water;  $c_{\infty}, c_s$  the concentration of water monomers far and on the drop surface, respectively;  $\rho_w$ , the water density and  $\Theta$ , the dynamic contact angle equal to  $\Theta_a$  (advancing contact angle) in the case of the condensation and to  $\Theta_r$  (receding contact angle) in the case of the evaporation.

As condensation ( / evaporation) experiments on iPDMS, PDMS and Si were performed in the same conditions, the only varying parameter is the geometrical argument (i.e.  $f(\Theta)$ ,  $G(\Theta)$  and  $\sin\Theta$ ) and the respective ratios of  $A$  and  $E$  were calculated and compared to the experimental values:

|                                          | PDMS | iPDMS | Si   |                      | theo. | exp. |
|------------------------------------------|------|-------|------|----------------------|-------|------|
| $\theta_a$ (°)                           | 120  | 105   | 75   | $A_{iPDMS}/A_{PDMS}$ | 1.4   | 3.8  |
| $\theta_r$ (°)                           | 60   | 105   | 55   | $A_{iPDMS}/A_{Si}$   | 0.6   | 1.2  |
| $A_{theo.}$ ( $\mu\text{m}^2/\text{s}$ ) | 0.41 | 0.57  | 0.97 | $E_{iPDMS}/E_{PDMS}$ | 0.5   | 0.5  |
| $E_{theo.}$ ( $\mu\text{m}^2/\text{s}$ ) | 1.26 | 0.57  | 1.39 | $E_{iPDMS}/E_{Si}$   | 0.4   | 0.2  |

Table 1: Advancing / receding contact angles, theoretical amplitude constants ( $A$  for condensation,  $E$  for evaporation) and comparison between theoretical and experimental amplitude constants ratios for PDMS, iPDMS and Si.

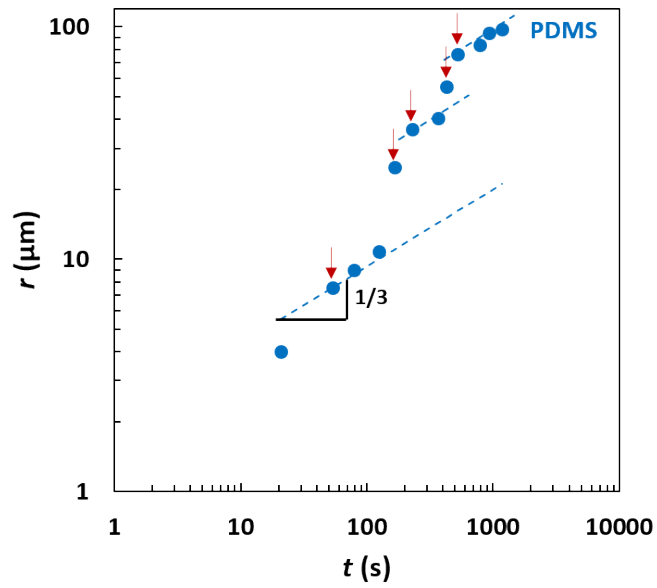

**Supplementary Figure S1: Droplet growth on PDMS horizontal surfaces:** Typical radius evolution of a single droplet on PDMS with time (coalescence events are indicated by red arrows).

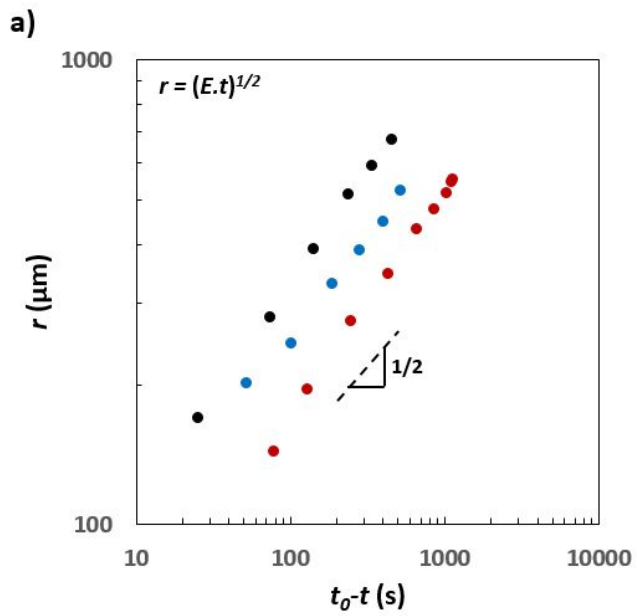

b)

| <u>Material</u> | $t_{\text{evap}}$ (s) | $E$ ( $\mu\text{m}^2/\text{s}$ ) |
|-----------------|-----------------------|----------------------------------|
| iPDMS           | 1100                  | 324                              |
| PDMS            | 950                   | 625                              |
| Si              | 530                   | 1369                             |

**Supplementary Figure S2: Evaporation of a deposited droplet on iPDMS, PDMS and Si surfaces:** a) Radius evolution of 0.5 $\mu\text{L}$  water droplet as function of time ( $t_0-t$ , with  $t_0$  the time of droplet disappearance). b) Time needed for the water droplet to completely evaporate and related values of  $E$ .

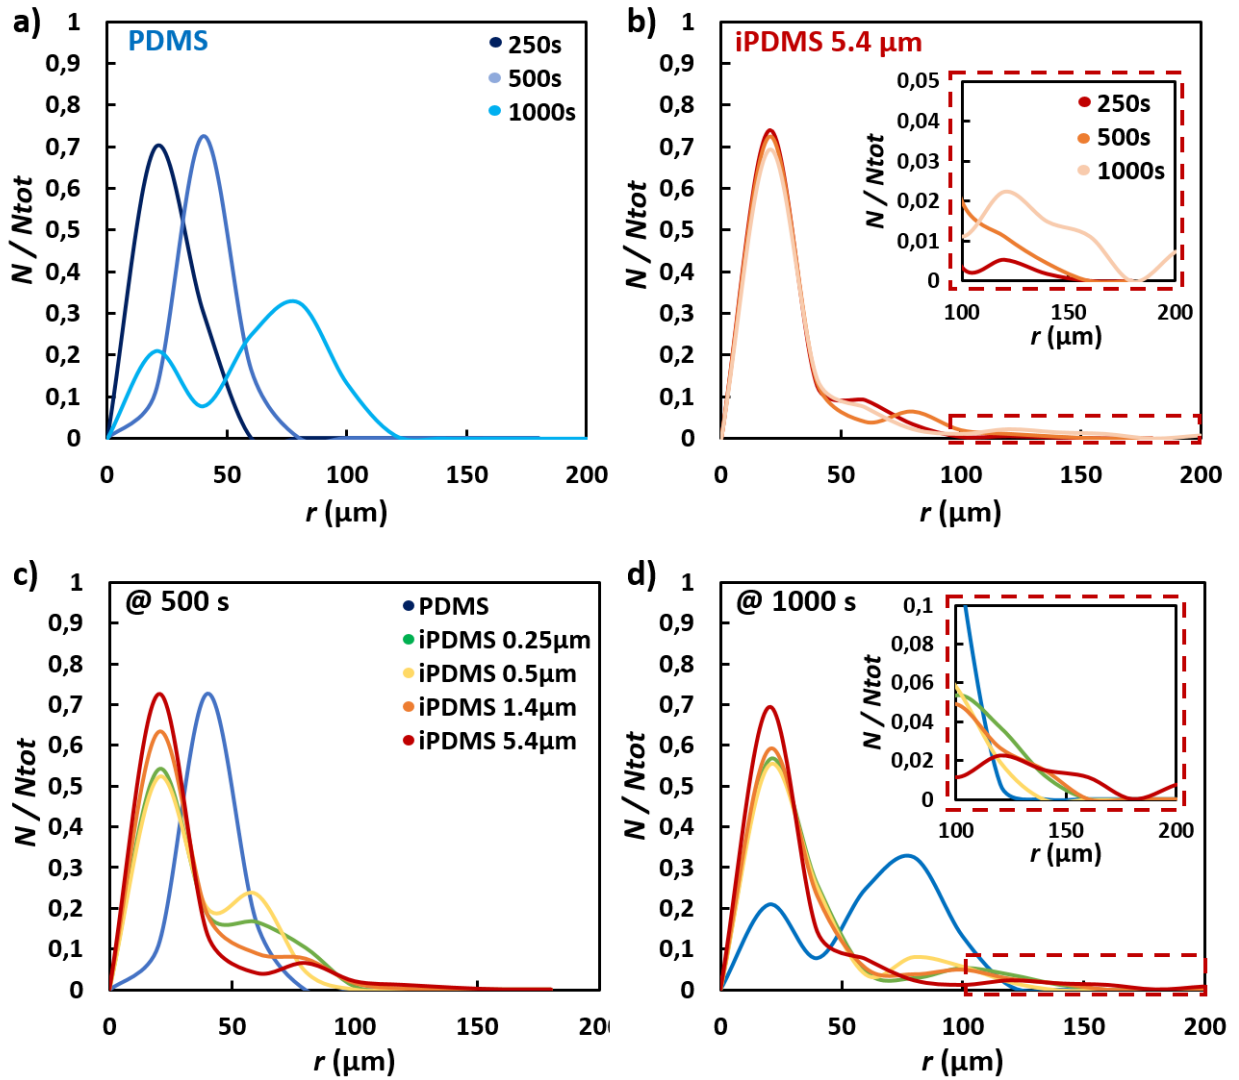

**Supplementary Figure S3: Normalized radius distribution of condensed water droplets on horizontal surfaces:** Evolution of the number of droplets,  $N$ , of radius  $r$ , for (a) PDMS and (b) iPDMS with 5.4  $\mu\text{m}$  oil thickness. Normalized size distribution for PDMS and iPDMS with various oil thicknesses at (c) 500 s and (d) 1000 s. (Step of 20  $\mu\text{m}$ ).

@1000s

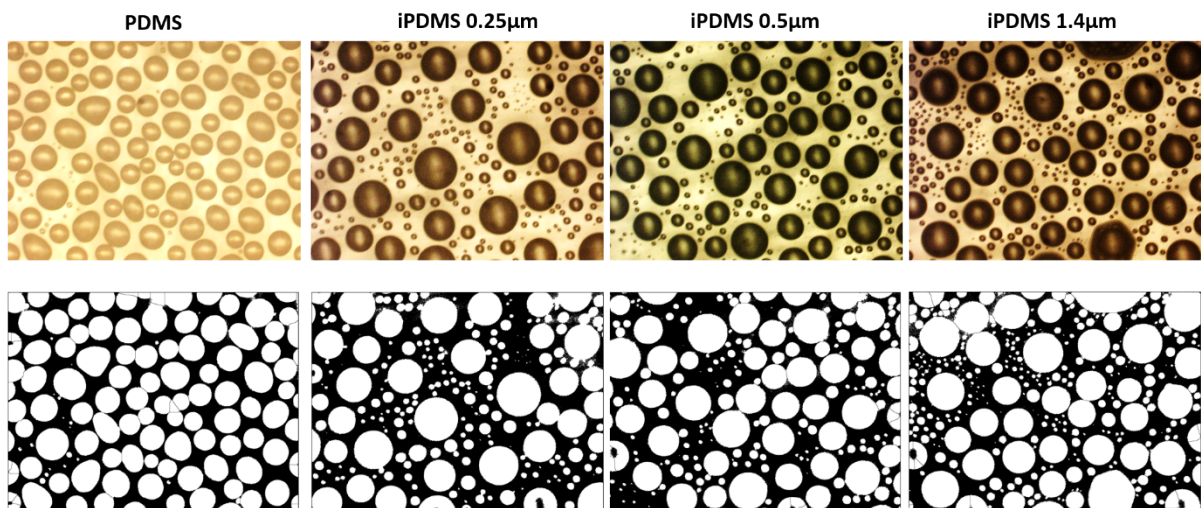

**Supplementary Figure S4: Microscope images for PDMS, iPDMS (0.25, 0.5 and 1.4µm):** Corresponding threshold images at 1000 s of condensation. The periphery of each droplet is well defined and only a few (2 or 3) drops display a visible wetting ridge for iPDMS 1.4µm.

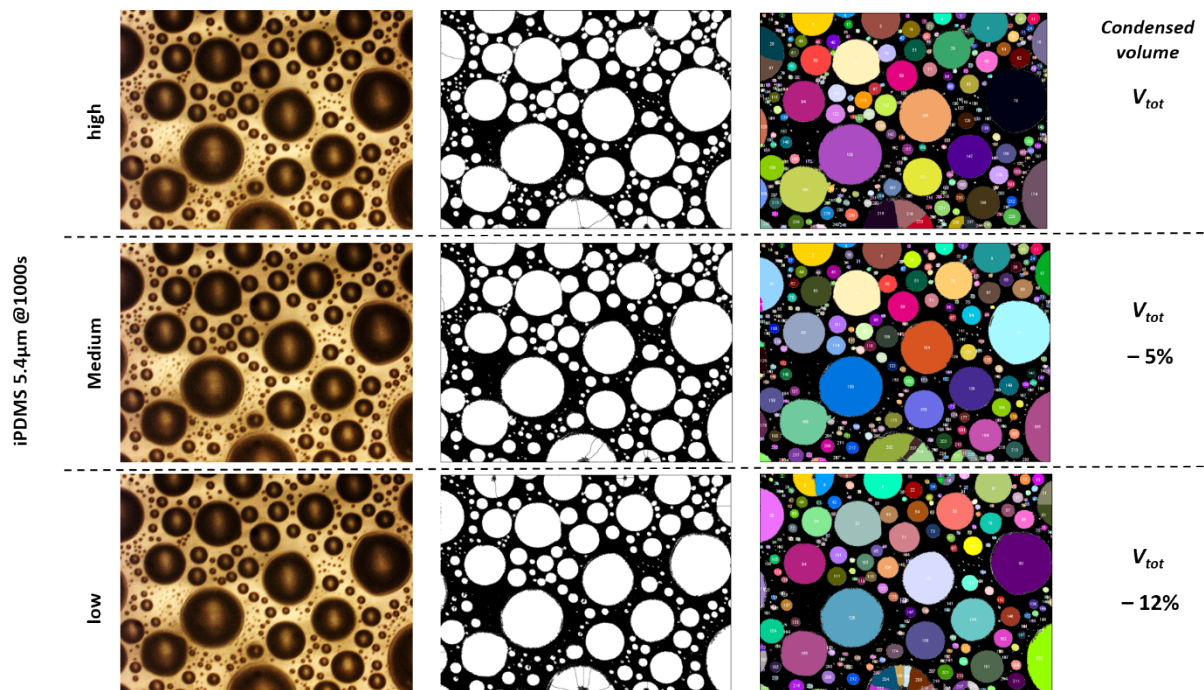

**Supplementary Figure S5: Microscope image for iPDMS 5.4µm at 1000s of condensation:** Comparison of the corresponding image analysis with low, medium and high threshold for removing the influence of the wetting ridge in the determination of the drop volumes.
